# Supplementary material for: Curating the Digital Mental Health Landscape With a Guide to Behavioral Health Apps: A County-Driven Resource
Source: Atypon-hosted journal article supplement (doi:10.1176/appi.ps.202000803), 2021-05-25
Supplement: appi.ps.202000803.ds001.pdf [file appi.ps.202000803.ds001.pdf]

App Review Testing Questions

Name of Reviewer:

Date of Review:

App Name and Version:

Describe basic Functionality:

Does it work on: Desktop\_ I-Phone\_ Yes Android\_

Free to Download?

Does it have Subscription services?

Who is the App designed for and what age groups?

Simplicity and ease of use:

Easy registration:

Is it fun to use and beneficial for the purpose intended?

Visual and sound design:

Does it promote creative and imaginative use?

Does it have features that help those with low vision, hearing impairments or other disabilities?

Does it ask for PHI? If yes, how does it state that this will be safe-guarded?

Does it list important number (i.e. Crisis Hotline)?

Does it provide feedback?

Do you recommend it for use in the Brochure?
